# Supplementary material
Source: Springer Nature journal article supplement (https://www.springermedizin.de/resource/supplementary/13601_2011_5_MOESM10_ESM.pdf/9677268)
Supplement: MOESM10 [file 9677268]

## STIMULUS

Allergen  
Histamine  
Methacholine  
Hyperosmolar solution  
Adenosine  
Mannitol

## DELIVERY

Powder  
Solution  
Paper disks  
Challenge chamber

## ASSESSMENT:

Symptom score  
Inspection of mucosa  
Weight of secretions  
Number of sneezes

Nasal flow/patency

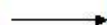

Rhinomanometry  
Acoustic rhinometry  
Peak flow

Cytology  
Mediators  
Cytokines  
NO

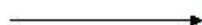

Brushing, scraping  
Biopsy  
Lavage
